# Supplementary material
Source: PubMed Central journal article supplement (PMC1160216)
Supplement: nar_33_suppl-2_W65__1.pdf [file nar_33_suppl-2_W65__1.pdf]

>PR8-34 r 1  
MSLLTEVETPIRNEWGCRCNGSSDPLAIAANIIGILHLTLWILDRLFFKCI  
YRRFKYGLKGGPSTEGVPKSMREEYRKEQQSAVDADDGHFVSIELE  
>mon88 r 1  
MSLLTEVETPIRNEWGCRCNDSSDPLAIAANIIGILHLTLWILDRLFFKCI  
YRRFKYGLKGGPSTEGVPKSMREEYRKEQQSAVDADDGHFVSIELE  
>LEN3-83 r 1  
MSLLTEVETPIRNEWGCRCNGSSDPLTIAANIIGILHLTLWILDRLFFKCI  
YRRFKYGLKGGPSTEGVPKSMREEYRKEQQSAVDADDGHFVSIELE  
>MOS88 r 1  
MSLLTEVETPIRNEWGCRCNGSSDPLTIAANIIGILHLTLWILDRLFFKCI  
YRRFKYGLKGGPSTEGVPKSMREEYRKEQQSAVDADDGHFVSIELE  
>MON86 r 1  
MSLLTEVETPIRNEWGCRCNGSSDPLTIAANIIGILHLTLWILDRLFFKCI  
YRRFKYGLKGGPSTEGVPKSMREEYRKEQQSAVDADDGHFVSIELE  
>SVER82 r 1  
MSLLTEVETPIRNEWGCRCNGSSDPLTIAANIIGILHLTLWILDRLFFKCI  
YRRFKYGLKRGPSSTEGVPESMREEYRKEQQSAVDADDSHFVSIELE  
>WS33 r 1  
MSLLTEVETPIRNEWGCRCNDSSDPLVIAANIIGILHLTLWILDRLFFKCI  
YRRFKYGLKRGPSSTEGVPESMREEYRKEQQNAVDVDDGHFVNIELE  
>LEN85 r 1  
MSLLTEVETPIRNEWGCRCNDSSDPLVVAANIIGILHLTLWILDRLFFKC  
IYRLFKHGLKRGPSSTEGVPESMREEYRKEQQSAVDADDSHFVSIELE  
>WSN33 r 1  
MSLLTEVETPIRNEWGCRCNDSSDPFVIAANIIGILHLTLWILDRLFFKCI  
YRRFKYGLKRGPSSTEGVPESMREEYRKEQQNAVDVDDGHFVNIELE  
>LEN49 r 1  
MSLLTEVETPIRNEWGCRCNDSSDPLVVAANIIGILHLTLWILDRLFFKC  
IYRLFKHGLKRGPSSTEGVPESMREEYRKEQQSAVDADDGHFVNIELE  
>LEN6-83 r 1  
MSLLTEVETPIRNEWGCRCNDSSDSLVAASIIGILHLTLWILDRLFFKCI  
YRFFKHGLKRGPSSTEGVPESMREEYRKEQQNAVDADDSHFVSIELE  
>SWONT81 r 1  
MSLLTEVETPIRNEWGCRCNDSSDPLVAAASIIGILHLTLWILDRLFFKCI  
YRRFKYGLKRGPSSTEGVPESMREEYRQKQQSAVDVDDGHFVNIVLE  
>SW29-37 r 1  
MSLLTEVETPIRNEWGCRCNDSSDPLVAAASIIGILHLTLWILDRLFFKCI  
YRRLEYGLKRGPSSTEGVPESMREEYRQKQQSAVDVDDGHFVNIELE  
>SWIA30 r 1  
MSLLTEVETPTRNEWGCRCNDSSDPLVAAASIIGILHLTLWILDRLFFKC  
IYRRLKYGLKRGPSSTEGVPESMREEYRQKQQSAVDVDDGHFVNIELE  
>SWWIS61 r 1  
MSLLTEVETPTRSEWGCRCNDSSDPLVAAASIIGILHLTLWILDRLFFKCI  
YRRFKYGLKRGPSSTEGVPESMREEYRQKQQSAVDVDDGHFVNIELE  
>SWIA88 r 1  
MSLLTEVETPIRNEWGCKCNDSSDPLVAVASIIGILHLTLWILDRLFFKCI  
YRRFKYGLKRGPSSTEGVPESMREEYRQKQQSAVDVDDGHFVNIELE

>WIS88 r 1  
MSLLTEVETPIRNEWGCRCNDSSDPLVAAASIIGILHLILWILDRLFLKCI  
YRRFKYGLKRGPSSTEGVPESMREEYRQKQQSAVDVDDGHFVNIVLE  
>SWMAR52 r 1  
MSLLTEVETPIRSEWGCRCNDSSDPLVAAASIIGILHLILWILDRLFFKCI  
YRRLEYGLKRGPSSTEGLPESMREEYRQKQQSAVDVDDGHFVNIELE  
>SWMAY54 r 1  
MSLLTEVETPIRSEWGCRCNDSSDPLVAAASIIGILHLILWILDRLFFKCI  
YRRLEYGLKRGPSSTEGLPESMREEYRQKQQSAVDVDDGHFVNIELE  
>SWTN77 r 1  
MSLLTEVETPIRSEWGCRCNDSSDPLVAAASIIGILHLILWILDRLFFKCI  
HRRFKYGLKRGPSSTEGVPESMREEYRQKQQSAVDVDDGHFVNIALE  
>EQPR56 r 1  
MSLLTEVETPIKSGWECRCNDSSDLLVAIASITGILHLILWIFDRLFFKC  
AYRRFRHGLKRGPSSTGGIPESMREEYRQEQQSDVNVDNGHFVNIELE  
>VIC72 s 0  
MSLLTEVETPIRNEWGCRCNDSSDPLVVAASIIGILHLILWILDRLFFKCI  
YRFFEHEGMLKRGPSSTEGVPESMREEYRKEQQSAVDADDSHFVSIELE  
>AICHI s 0  
MSLLTEVETPIRNEWGCRCNDSSDPLVVAASIIGILHLILWILDRLFFKCI  
YRFFEHEGLKRGPSSTEGVPESMREEYRKEQQSAVDADDSHFVSIELE  
>UDORN72 s 0  
MSLLTEVETPIRNEWGCRCNDSSDPLVVAASIIGILHLILWILDRLFFKCI  
YRFFEHEGLKRGPSSTEGVPESMREEYRKEQQSAVDADDSHFVSIELE  
>PC73 s 0  
MSLLTEVETPIRNEWGCRCNDSSDPLVVAASIIGILHLILWILDRLFFKCI  
YRFFEHEGLKRGPSSTEGVPESMREEYRKEQQSAVDADDSHFVSIELE  
>SING57 s 0  
MSLLTEVETPIRNEWGCRCNDSSDPLVVAASIIGILHLILWILDRLFFKCI  
YRFFKHGLKRGPSSTEGVPESMREEYRKEQQSAVDADDSHFVSIELE  
>AA60 s 0  
MSLLTEVETPIRNEWGCRCNDSSDPLVVAASIIGILHLILWILDHLFFKCI  
YRFFKHGLKRGPSSTEGVPESMREEYRKEQQSAVDADDSHFVSIELE  
>KOREA68 s 0  
MSLLTEVETPIRNEWGCRCNDSSDPLVVAASIIGILHFILWILDRLFFKCI  
YRFFKHGLKRGPSSTEGVPESMREEYRKEQQSAVDADDSHFVSIELE  
>BANG79 s 0  
MSLLTEVETPIRNEWGCRCNDSSDPLVVAASIIGILHLILWILDRLFFKCI  
YRFFKHGLKRGPSSTEGVPESMREEYRKEQQNAVDADDSHFVSIELE  
>FW50 s 0  
MSLLTEVETPIRNEWGCRCNDSSDPLVVAASIIGILHLILWILDRLFFKCI  
YRFFKHGLKRGPSSTEGVPESMREEYRKEQQSAVDADDSHFVNIELE  
>MEM88 s 0  
MSLLTEVETPIRNEWGCRCNDSSDPLVVAASIIGILHLILWILDRLFFKCI  
YRFFKHGLKRGPSSTEGVPESMREEYRKEQQNAVDADDSHFVSIELE  
>USSR77 s 0  
MSLLTEVETPIRNQWGCRCNDSSDPLVVAASIIGILHLILWILDRLFFKCI  
YRFFKHGLKRGPSSTEGVPESMREEYRKEQQNAVDADDSHFVNIELE  
>PINALB79s 0

MSLLTEVETPTRNGWECKCSDSSDPLVIAASIIGILHLILWILDRLFFKCI  
YRRLKYGLKRGPSSTEGVPESMREEYRQEQQSAVDVDDSHFVNIELE  
>SWHK82 s 0  
MSLLTEVETPTRNGWECKCSDSSDPLVIAASIIGILHLILWILDRLFFKCI  
YRRLKYGLKRGPSSTEGVPESMREEYRQEQQSAVDVDDGHFVNIELE  
>SWNED85 s 0  
MSLLTEVETPTRNGWGCRFSDSSDPLVIAASIIGILHLILWILDRLFFKCI  
YRRLKYGLKRGPSSTEGVPESMREEYRQEQQNAVDVDDGHFVNIELE  
>FPVR34 s 0  
MSLLTEVETPTRNGWECRCNDSSDPLIIAASIIGILHLILWILNRLFFKCI  
YRRLKYGLKRGPSSTEGVPESMREEYRQEQQSAVDVDDGHFVNIELE  
>MLRDNY78s 0  
MSLLTEVETPTRNGWECKCSDSSDPLVIAASIIGILHLILWILDRLFFKCI  
YRRLKYGLKRGPSSTEGVPESMREEYRQEQQSAVDVDDGHFVNIELE  
>TYMN81 s 0  
MSLLTEVETPTRNGWECKCSDSSDPLVIAASIIGILHLILWILDRLFFKCI  
YRRLKYGLKRGPSSTEGVPESMREEYRQEQQSAVDVDDGHFVNIELE  
>TYMN80 s 0  
MSLLTEVETPTRNGWECKCSDSSDPLVIAASIIGILHLILWILDRLFFKCI  
YRRLKYGLKRGPSSTEGVPESMREEYRQEQQNAVDVDDGHFVNIELE  
>CKVIC85 s 0  
MSLLTEVETPTRNGWECKCSDSSDPLVIAASIIGILHLILWILDRLFFKCI  
YRRLKYGLKRGPSSTEGVPESMREEYRQEQQSAVDVDDGHFANIELE  
>FPVD27 s 0  
MSLLTEVETPTRNGWECSCSDSSDPLVIAASIIGILHLILWILDRLFFKCI  
YRRLKYGLKRGPSSTEGVPESMREEYRQEQQNAVDVDDGHFVNIELE  
>DKCZ56 s 0  
MSLLTEVETPTRNGWECRYSGSSDPLVIAASIIGILHLILWILDRLFFKCI  
YRCLKHGLKRGPSSTEGVPKSMREEYRQEQQNAVDVDDGHFVNIELE  
>FPVW27 s 0  
MSLLTEVETPTRNGWECSCSDSSDPLVIAASIIGILHFILWILDRLFFKCI  
YRRLKYGLKRGPSSTEGVPESMREEYRQEQQNAVDVDDGHFVNIELE  
>GULMA80 s 0  
MSLLTEVETHTRSGWECRCNDSSDPLVIAASIIGILHLILWILDRLFFKCI  
YRRLKYGLKRGPSSTEGVPESMREEYQQEKQSAVDVDDGHFVNIELE  
>GULMD79 s 0  
MSLLTEVETHTRSGWECRCNDSSDPLVIAASIIGILHLILWILDRLFFKCI  
YRRLKYGLKRGPSSTEGVPESMREEYQQEKQSAVDVDDGHFVNIELE  
>BUDHOK77s 0  
MSLLTEVETPTKNGWECKCSDSSDPLIIAASIIGILHLILWILDRLFFKCI  
YRRLKYGLKRGPSSTEGVPESMREEYRQEQQSVVDVDDGHFVNIELE  
>EQKY86 s 0  
MSLLTEVETPTRNGWECKCSGSSDPLVIAASIIGILHLILWILDRLFFKFI  
YRRLKYGLKRGPSSTEGVPESMREEYRQEQQNAVDVDDGHFVNIELE  
>GULMD78 s 0  
MSLLTEVETHTRSGWECRCNDSSDPLVIAASIIGILHLILWIFDRLFFKCI  
YRRLKYGLKRGPSSTEGVPESMREEYQQEKQSAVDVDDGHFVNIELE  
>CKPEN1-83s 0  
MSLLTEVETLTRNGWECKYSDSSDPLIIAASIIGILHLILWILDRLFFKCI  
YRRLKYGLKRGPSSTEGAPESMREEYRQEQQSAVDVDDVHFVNIELE

>EQTN86 s 0

MSLLTEVETPTRNGWECKCSGSSDPLVIAASIIGILHLILWILDRLFFKFI  
YRLKYGLKGGPSTEGVPESMREEYRQEQQNAVDVDDGHFVNIELE

>CKPEN0-83s 0

MSLLTEVETLTRNGWECKCSDSSDPLIAASIIGILHLILWIFYRLFFKCIY  
RRLKYGLKGGPSTEGAPESMREEYRQEQQSAVDVDDVHFVNIELE
