# Supplementary material
Source: PubMed Central journal article supplement (PMC1160216)
Supplement: nar_33_suppl-2_W65_v2_1.pdf [file nar_33_suppl-2_W65_v2_1.pdf]

**Table 1:** List of protein analysis tools and databases interfaced by PAT.

| <b>Name</b>                              | <b>Description</b>                                                         | <b>Reference</b> | <b>Output parser</b> |
|------------------------------------------|----------------------------------------------------------------------------|------------------|----------------------|
| <i>Databases</i>                         |                                                                            |                  |                      |
| SWISSPROT                                | Manually-annotated protein sequences                                       | (1)              |                      |
| SPTREMBL                                 | SWISSPROT + Computer-analized protein sequences not yet manually-annotated | (1)              |                      |
| UNIREF100                                | Non-redundant protein sequences at 100% ident.                             | (1)              |                      |
| UNIREF50                                 | Non-redundant protein sequences at 50% ident.                              | (1)              |                      |
| PFAM                                     | Protein sequence families                                                  | (2)              |                      |
| Protein Data Bank                        | Protein 3D structures                                                      | (3)              |                      |
| PDB_seq                                  | PDB sequences in FASTA format                                              | (4)              |                      |
| <i>Primary sequence analysis</i>         |                                                                            |                  |                      |
| AACOMPO                                  | Amino acid composition statistics                                          | Local            |                      |
| PEPTIDE_MASS                             | Peptide mass computation                                                   | (5)              |                      |
| PEPTIDE_CUTTER                           | Protease clivage site search                                               | (6)              |                      |
| SIGNALP                                  | Signal peptide prediction                                                  | (7)              | +                    |
| <i>Cellular localization prediction</i>  |                                                                            |                  |                      |
| PSORT                                    | Cell location prediction                                                   | (8)              | +                    |
| TARGETP                                  | Cell location and cleavage site predictions                                | (9)              | +                    |
| PROTFUN                                  | Prediction of cellular role, enzyme class and GO category                  | (10,11)          |                      |
| <i>Non globular structure prediction</i> |                                                                            |                  |                      |
| TMAP                                     | Transmembrane segment prediction                                           | (12)             | +                    |
| TMPRED                                   | Transmembrane segment prediction                                           | (13)             | +                    |
| TOPPRED                                  | Transmembrane segment prediction                                           | (14)             | +                    |
| SEG                                      | Compositional bias detection                                               | (15)             | +                    |
| CAST                                     | Compositional bias detection                                               | (16)             | +                    |
| NCOILS                                   | Coiled-coil prediction                                                     | (17)             | +                    |
| GLOBULAR                                 | Consensus non globular segment prediction                                  | Local            | +                    |
| <i>Sequence similarity search</i>        |                                                                            |                  |                      |
| WUBLAST2                                 | Fast sequence similarity search                                            | (18)             | +                    |
| PSIBLAST                                 | Fast and iterative sequence similarity search                              | (19)             | +                    |
| HMM                                      | Hidden Markov models based similarity search                               | (20)             | +                    |
| HMMPFAM                                  | Match a sequence against an HMM database                                   | (20)             | +                    |
| CDHIT                                    | Exhaustive database homology search                                        | (21)             | +                    |
| <i>Sequence alignment</i>                |                                                                            |                  |                      |
| CLUSTALW                                 | Hierarchical multiple sequence alignment                                   | (22)             | +                    |
| MUSCLE                                   | Multiple sequence alignment                                                | (23)             | +                    |
| LALIGN                                   | Local pairwise alignments                                                  | (24)             | +                    |
| MVIEW                                    | Multiple sequence alignment viewer                                         | (25)             |                      |
| <i>Sequence motif search</i>             |                                                                            |                  |                      |
| PS_SCAN                                  | PROSITE motif search                                                       | (26)             |                      |

|                                                   |                                                                                           |         |   |
|---------------------------------------------------|-------------------------------------------------------------------------------------------|---------|---|
| MOTIF                                             | Protein sequence motif search                                                             | (27)    |   |
| GREP                                              | Regular expression search                                                                 | Local   |   |
| MATRIX                                            | Pairwise scoring matrix from aligned sequences                                            | Local   | + |
| <b><i>Phylogeny inference and display</i></b>     |                                                                                           |         |   |
| BIONJ                                             | Distance-based phylogeny inference                                                        | (28)    | + |
| FASTME                                            | Distance-based phylogeny inference                                                        | (29)    | + |
| ATV                                               | Phylogenetic tree applet viewer                                                           | (30)    |   |
| <b><i>Secondary structure prediction</i></b>      |                                                                                           |         |   |
| PSIPRED                                           | Secondary structure prediction                                                            | (31)    | + |
| PREDATOR                                          | Secondary structure prediction                                                            | (32)    | + |
| DSC                                               | Secondary structure prediction                                                            | (33)    | + |
| SIMPA96                                           | Secondary structure prediction                                                            | (34)    | + |
| PRED2D                                            | Consensus secondary structure prediction                                                  | Local   | + |
| <b><i>Solvent accessibility prediction</i></b>    |                                                                                           |         |   |
| NETASA                                            | Solvent accessibility prediction                                                          | (35)    | + |
| <b><i>Tertiary structure analysis</i></b>         |                                                                                           |         |   |
| DSSP                                              | Secondary structure assignment from PDB files                                             | (36)    | + |
| STRIDE                                            | Structural analysis of PDB files                                                          | (37)    | + |
| PDBGEO                                            | PDB file geometrical analysis                                                             | Local   | + |
| PDBINTER                                          | Residue surfaces buried by inter-chain contacts                                           | Local   |   |
| KNOTER                                            | Standard numbering of knottin structures                                                  | (38,39) |   |
| <b><i>Tertiary structure display</i></b>          |                                                                                           |         |   |
| Jmol                                              | PDB file applet viewer                                                                    | (40)    |   |
| <b><i>Tertiary structure superpimposition</i></b> |                                                                                           |         |   |
| CE                                                | Pairwise structural alignment                                                             | (41)    | + |
| SHEBA                                             | Pairwise structural alignment                                                             | (42)    | + |
| PROFIT                                            | Pairwise structure least square fit                                                       | (43)    | + |
| <b><i>Tertiary structure modelling</i></b>        |                                                                                           |         |   |
| SMD                                               | Combinatorial amino acid side chain placement                                             | (44)    | + |
| SCWRL                                             | Rotamer-based amino acid side chains placement                                            | (45)    | + |
| PDBBLAST                                          | Search and align homologs with known structures                                           | Local   | + |
| <b><i>Tertiary structure evaluation</i></b>       |                                                                                           |         |   |
| VERIFY3D                                          | Potential-based structure evaluation                                                      | (46,47) | + |
| EVAL23D                                           | Potential-based structure evaluation                                                      | (48)    | + |
| TITO                                              | Sequence-structure compatibility evaluation                                               | (49)    |   |
| EVDTREE                                           | Potential-based structure evaluation                                                      | (50)    |   |
| <b><i>Other tools</i></b>                         |                                                                                           |         |   |
| COLOR                                             | Displays colored HTML outputs of aligned sequences, predictions, consensus or evaluations | Local   | + |
| CONSENSUS                                         | Builds sequence and/or prediction consensus                                               | Local   | + |
| SIM2ALI                                           | Creates a multiple alignment from BLAST similarities                                      | Local   | + |

---

**SORT**                      Sort protein segments according to name, type, Local                      +  
length or position

---

## References

1. Bairoch, A., Apweiler, R., Wu, C.H., Barker, W.C., Boeckmann, B., Ferro, S., Gasteiger, E., Huang, H., Lopez, R., Magrane, M. *et al.* (2005) The Universal Protein Resource (UniProt). *Nucleic Acids Res*, 33 Database Issue, D154-159.
2. Bateman, A., Coin, L., Durbin, R., Finn, R.D., Hollich, V., Griffiths-Jones, S., Khanna, A., Marshall, M., Moxon, S., Sonnhammer, E.L. *et al.* (2004) The Pfam protein families database. *Nucleic Acids Res*, 32, D138-141.
3. Berman, H.M., Westbrook, J., Feng, Z., Gilliland, G., Bhat, T.N., Weissig, H., Shindyalov, I.N. and Bourne, P.E. (2000) The Protein Data Bank. *Nucleic Acids Res*, 28, 235-242.
4. RCSB. Information derived from PDB files: sequences in FASTA format (<http://www.rcsb.org>).
5. Wilkins, M.R., Lindskog, I., Gasteiger, E., Bairoch, A., Sanchez, J.C., Hochstrasser, D.F. and Appel, R.D. (1997) Detailed peptide characterization using PEPTIDEMASS--a World-Wide-Web-accessible tool. *Electrophoresis*, 18, 403-408.
6. ExPASy. PeptideCutter predicts potential cleavage sites cleaved by proteases or chemicals in a given protein sequence. <http://caexpasyorg/tools/peptidecutter/>.
7. Bendtsen, J.D., Nielsen, H., von Heijne, G. and Brunak, S. (2004) Improved prediction of signal peptides: SignalP 3.0. *J Mol Biol*, 340, 783-795.
8. Gardy, J.L., Laird, M.R., Chen, F., Rey, S., Walsh, C.J., Ester, M. and Brinkman, F.S. (2004) PSORTb v.2.0: expanded prediction of bacterial protein subcellular localization and insights gained from comparative proteome analysis. *Bioinformatics*.
9. Emanuelsson, O., Nielsen, H., Brunak, S. and von Heijne, G. (2000) Predicting subcellular localization of proteins based on their N-terminal amino acid sequence. *J Mol Biol*, 300, 1005-1016.
10. Jensen, L.J., Gupta, R., Blom, N., Devos, D., Tamames, J., Kesmir, C., Nielsen, H., Staerfeldt, H.H., Rapacki, K., Workman, C. *et al.* (2002) Prediction of human protein function from post-translational modifications and localization features. *J Mol Biol*, 319, 1257-1265.
11. Jensen, L.J., Gupta, R., Staerfeldt, H.H. and Brunak, S. (2003) Prediction of human protein function according to Gene Ontology categories. *Bioinformatics*, 19, 635-642.
12. Milpetz, F., Argos, P. and Persson, B. (1995) TMAP: a new email and WWW service for membrane-protein structural predictions. *Trends Biochem Sci*, 20, 204-205.
13. Hofmann, K. and Stoffel, W. (1993) TMBASE - A database of membrane spanning protein segments. *Biol Chem Hoppe-Seyler*, 374, 166.
14. Claros, M.G. and von Heijne, G. (1994) TopPred II: an improved software for membrane protein structure predictions. *Comput Appl Biosci*, 10, 685-686.
15. Wootton, J.C. (1994) Non-globular domains in protein sequences: automated segmentation using complexity measures. *Comput Chem*, 18, 269-285.
16. Promponas, V.J., Enright, A.J., Tsoka, S., Kreil, D.P., Leroy, C., Hamodrakas, S., Sander, C. and Ouzounis, C.A. (2000) CAST: an iterative algorithm for the complexity analysis of sequence tracts. Complexity analysis of sequence tracts. *Bioinformatics*, 16, 915-922.
17. Russel, R.B. and Lupas, A.N. (1999) based on Lupas, Van Dyck & Stock (1991) *Science* 252,1162-1164. *Pfam: coiled-coils*.
18. Gish, W. (1996-2004). <http://blastwustledu>.
19. Altschul, S.F., Madden, T.L., Schaffer, A.A., Zhang, J., Zhang, Z., Miller, W. and Lipman, D.J. (1997) Gapped BLAST and PSI-BLAST: a new generation of protein database search programs. *Nucleic Acids Res*, 25, 3389-3402.
20. Eddy, S.R. (1998) Profile hidden Markov models. *Bioinformatics*, 14, 755-763.

21. Li, W., Jaroszewski, L. and Godzik, A. (2001) Clustering of highly homologous sequences to reduce the size of large protein databases. *Bioinformatics*, 17, 282-283.
22. Thompson, J.D., Higgins, D.G. and Gibson, T.J. (1994) CLUSTAL W: improving the sensitivity of progressive multiple sequence alignment through sequence weighting, position-specific gap penalties and weight matrix choice. *Nucleic Acids Res*, 22, 4673-4680.
23. Edgar, R.C. (2004) MUSCLE: a multiple sequence alignment method with reduced time and space complexity. *BMC Bioinformatics*, 5, 113.
24. Pearson, W.R. (2000) Flexible sequence similarity searching with the FASTA3 program package. *Methods Mol Biol*, 132, 185-219.
25. Brown, N.P., Leroy, C. and Sander, C. (1998) MView: a web-compatible database search or multiple alignment viewer. *Bioinformatics*, 14, 380-381.
26. Gattiker, A., Gasteiger, E. and Bairoch, A. (2002) ScanProsite: a reference implementation of a PROSITE scanning tool. *Appl Bioinformatics*, 1, 107-108.
27. Motif. Sequence motif search. <http://motifgenome.jp/>.
28. Gascuel, O. (1997) BIONJ: an improved version of the NJ algorithm based on a simple model of sequence data. *Mol Biol Evol*, 14, 685-695.
29. Desper, R. and Gascuel, O. (2002) Fast and accurate phylogeny reconstruction algorithms based on the minimum-evolution principle. *J Comput Biol*, 9, 687-705.
30. Zmasek, C.M. and Eddy, S.R. (2001) ATV: display and manipulation of annotated phylogenetic trees. *Bioinformatics*, 17, 383-384.
31. Jones, D.T. (1999) Protein secondary structure prediction based on position-specific scoring matrices. *J Mol Biol*, 292, 195-202.
32. Frishman, D. and Argos, P. (1996) Incorporation of non-local interactions in protein secondary structure prediction from the amino acid sequence. *Protein Eng*, 9, 133-142.
33. King, R.D., Saqi, M., Sayle, R. and Sternberg, M.J. (1997) DSC: public domain protein secondary structure prediction. *Comput Appl Biosci*, 13, 473-474.
34. Levin, J.M. (1997) Exploring the limits of nearest neighbour secondary structure prediction. *Protein Eng*, 10, 771-776.
35. Ahmad, S. and Gromiha, M.M. (2002) NETASA: neural network based prediction of solvent accessibility. *Bioinformatics*, 18, 819-824.
36. Kabsch, W. and Sander, C. (1983) Dictionary of protein secondary structure: pattern recognition of hydrogen-bonded and geometrical features. *Biopolymers*, 22, 2577-2637.
37. Heinig, M. and Frishman, D. (2004) STRIDE: a web server for secondary structure assignment from known atomic coordinates of proteins. *Nucleic Acids Res*, 32, W500-502.
38. Gelly, J.C., Gracy, J., Kaas, Q., Le-Nguyen, D., Heitz, A. and Chiche, L. (2004) The KNOTTIN website and database: a new information system dedicated to the knottin scaffold. *Nucleic Acids Res*, 32, D156-159.
39. Chiche, L., Heitz, A., Gelly, J.C., Gracy, J., Chau, P.T., Ha, P.T., Hernandez, J.F. and Le-Nguyen, D. (2004) Squash inhibitors: from structural motifs to macrocyclic knottins. *Curr Protein Pept Sci*, 5, 341-349.
40. SourceForge.net. Jmol is a free, open source Java molecule viewer. <http://jmol.sourceforge.net/>.
41. Shindyalov, I.N. and Bourne, P.E. (1998) Protein structure alignment by incremental combinatorial extension (CE) of the optimal path. *Protein Eng*, 11, 739-747.
42. Jung, J. and Lee, B. (2000) Protein structure alignment using environmental profiles. *Protein Eng*, 13, 535-543.
43. Martin, A.C.R. ProFit: Fitting is performed using the McLachlan algorithm (McLachlan, A.D., 1982 "Rapid Comparison of Protein Structures", *Acta Cryst A*38, 871-873). <http://www.bioinf.org.uk/software/profit>.
44. Tuffery, P., Etchebest, C., Hazout, S. and Lavery, R. (1991) A new approach to the rapid determination of protein side chain conformations. *J Biomol Struct Dyn*, 8, 1267-1289.

45. Dunbrack, R.L., Jr. and Karplus, M. (1993) Backbone-dependent rotamer library for proteins. Application to side-chain prediction. *J Mol Biol*, 230, 543-574.
46. Luthy, R., Bowie, J.U. and Eisenberg, D. (1992) Assessment of protein models with three-dimensional profiles. *Nature*, 356, 83-85.
47. Bowie, J.U., Luthy, R. and Eisenberg, D. (1991) A method to identify protein sequences that fold into a known three-dimensional structure. *Science*, 253, 164-170.
48. Gracy, J., Chiche, L. and Sallantin, J. (1993) Improved alignment of weakly homologous protein sequences using structural information. *Protein Eng*, 6, 821-829.
49. Labesse, G. and Mornon, J. (1998) Incremental threading optimization (TITO) to help alignment and modelling of remote homologues. *Bioinformatics*, 14, 206-211.
50. Gelly, J.C., Chiche, L. and Gracy, J. (2005) EvDTree: structure-dependent substitution profiles based on decision tree classification of 3D environments. *BMC Bioinformatics*, 6, 4.
